# Supplementary material for: Proteogenomic characterization of the non-muscle-invasive bladder cancer response to BCG reveals potential therapeutic strategies
Source: Research Square preprint supplement (doi:10.21203/rs.3.rs-4008035/v1), 2024-03-06
Supplement: Supplementary file 1 [file bf219ea7985da95ff3f2b3e7.xlsx]

## Sheet: Sheet1
Characteristic	NR(n=33)	R(n=53)	P.value
Gender			0.8
Female	6(18%)	11(21%)
Male	27(82%)	42(79%)
Age	62(54,67)	63(53,67)	>0.9
Smonking history	9(27%)	19(36%)	0.4
Drinking history	6(18%)	12(23%)	0.6
Cardiovascular disease	13(39%)	17(32%)	0.5
Family history of cancer	2(6.1%)	5(9.4%)	0.7
Histologic subtype			0.8
Papillay	23(70%)	38(72%)
Non-papillary	10(30%)	15(28%)
Combined CIS	7(21%)	7(13%)	0.3
Risk			0.6
High	30(91%)	49(92%)
Low	1(3.0%)	0(0%)
Middle	2(6.1%)	4(7.5%)
T satge			0.12
T1	23(70%)	45(85%)
Ta	9(27%)	8(15%)
Tis	1(3.0%)	0(0%)
n(%); Median (IQR)
Pearson'sChi-squared test; Wilcoxon rank sum test; Fisher's exact test
